# Supplementary material
Source: HighWire-hosted journal article supplement (https://jnm.snmjournals.org/highwire/filestream/95410/field_highwire_adjunct_files/0/216853_Supplemental_Data.pdf)
Supplement: 216853_Supplemental_Data.pdf [file 216853_Supplemental_Data.pdf]

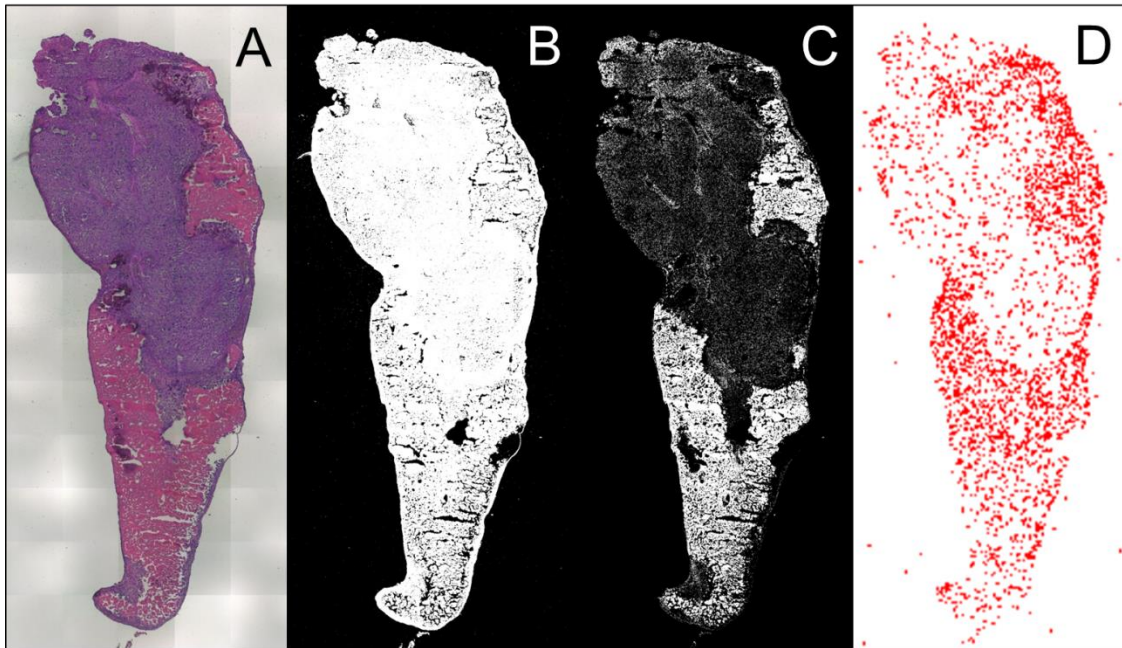

Supplemental Figure 1. A) The tissue extracted from Fig. 1A. B) The binarized image (in white) by setting a threshold level (138/256) in 8-bit grey scale for discriminating the background (in black). C) The binarized image for extracting the pink colour region (in white) by setting band-pass thresholds of 24-bit colour levels (red, 123-177; green, 42-84; blue, 94-139). D) The scatter plot of  $\alpha$ -particle tracks on the tissue from Fig. 1B.
